# Supplementary material for: CRL4BDCAF11 E3 ligase targets p21 for degradation to control cell cycle progression in human osteosarcoma cells
Source: PubMed Central journal article supplement (PMC5430835; doi:10.1038/s41598-017-01344-9), 2017-04-26
Supplement: 41598_2017_1344_MOESM1_ESM.pdf [file 41598_2017_1344_MOESM1_ESM.pdf]

**CRL4B<sup>DCAF11</sup> E3 ligase targets p21 for degradation to control cell cycle progression  
in human osteosarcoma cells**

Zhi Chen<sup>1, #</sup>, Kun Wang<sup>1, #</sup>, Canglong Hou<sup>2, #</sup>, Kaibiao Jiang<sup>1</sup>, Bin Chen<sup>1</sup>, Jianwei Chen<sup>1</sup>,  
Lifeng Lao<sup>1</sup>, Lie Qian<sup>1</sup>, Guibin Zhong<sup>1</sup>, Zude Liu<sup>1</sup>, Caiguo Zhang<sup>3, \*</sup>, Hongxing Shen<sup>1, \*</sup>

<sup>1</sup>Department of Spine Surgery, Renji Hospital, School of Medicine, Shanghai Jiao Tong University, Shanghai, China

<sup>2</sup>Department of Orthopedics, Changhai Hospital, Secondary Military Medical University, Shanghai, China

<sup>33</sup>Department of Dermatology, University of Colorado Anschutz Medical Campus, Aurora, CO, USA

<sup>#</sup> These authors contribute equally to this work.

\* Corresponding: [caiguo.zhang@ucdenver.edu](mailto:caiguo.zhang@ucdenver.edu) and [shenhxgk@126.com](mailto:shenhxgk@126.com)

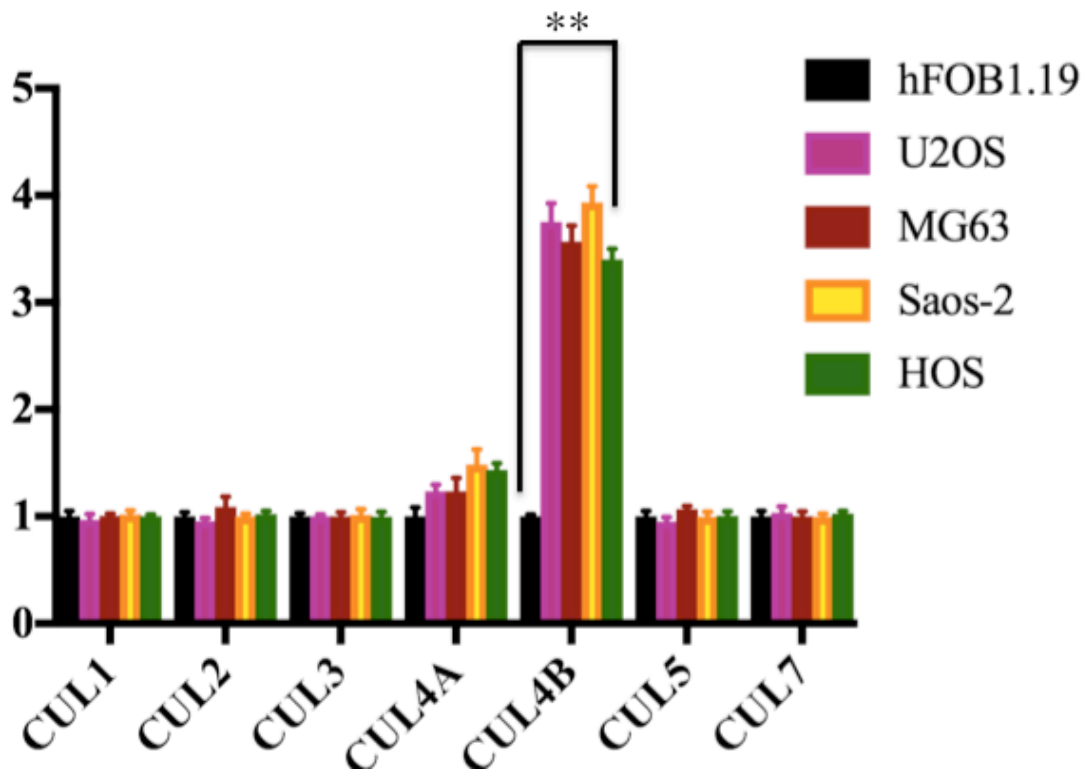

**Supplementary Figure 1. CUL4B is upregulated in human osteosarcoma cells.**  
 Protein levels in Figure 1B were normalized against  $\beta$ -Actin. \*\* $P < 0.001$ .

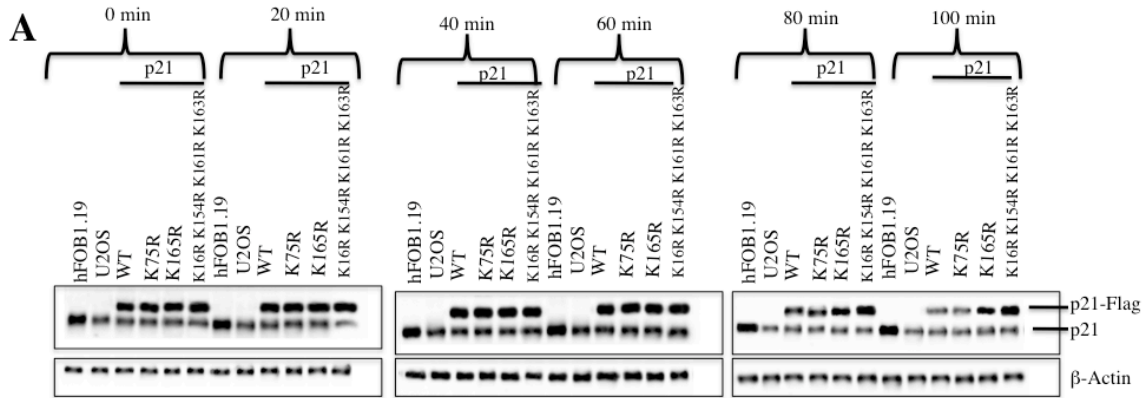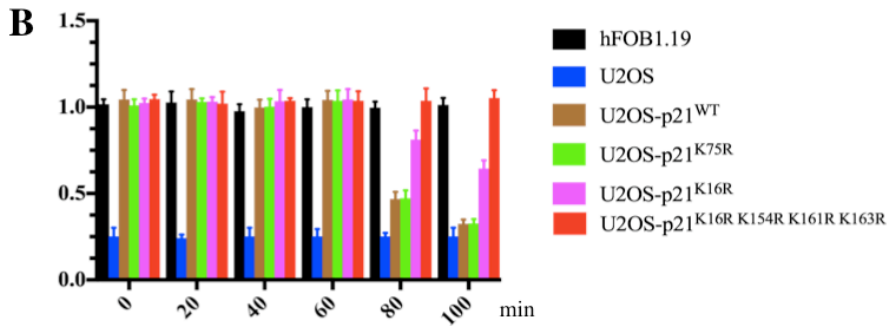

**Supplementary Figure 2. The ubiquitination site mutants have longer half-lives.**

(A) The p21<sup>K16R K154R K161R K163R</sup>-Flag protein has a longer half-life. The p21<sup>WT</sup>-Flag, p21<sup>K16R</sup>-Flag, p21<sup>K75R</sup>-Flag, or p21<sup>K16R K154R K161R K163R</sup>-Flag plasmid was transfected into U2OS cells, followed by immediate treatment with MG132 after transfection and by changing the medium every 12 h. After 48 h, cells were incubated with fresh medium without MG132, and samples were collected every 20 min. The cell lysates were subjected to WB to determine Flag tagged proteins by using anti-p21 antibody. β-Actin was used as a loading control. The half-lives were calculated from three independent experiments and are presented as the means ± SE. (B) Normalization of proteins levels in (A).

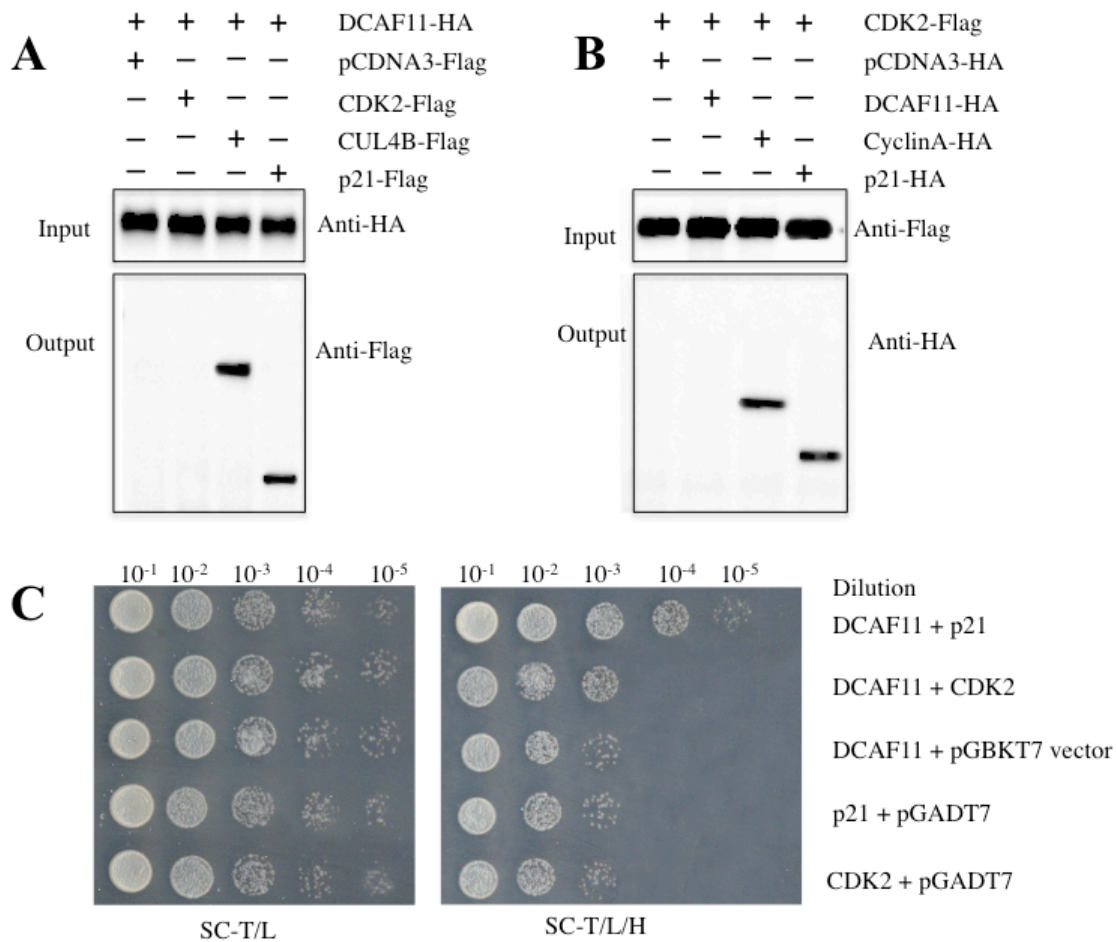

### Supplementary Figure 3. DCAF11 does not interact with CDK2.

(A–B) DCAF11 does not interact with CDK2. U2OS cells co-transfected with *pCDNA3-DCAF11-HA* + *pCDNA3-Flag*, *pCDNA3-DCAF11-HA* + *pCDNA3-CDK2-Flag*, *pCDNA3-DCAF11-HA* + *pCDNA3-CUL4B-Flag*, *pCDNA3-DCAF11-HA* + *pCDNA3-p21-Flag*, *pCDNA3-CDK2-Flag* + *pCDNA3-HA*, *pCDNA3-CDK2-Flag* + *pCDNA3-DCAF11-HA*, *pCDNA3-CDK2-Flag* + *pCDNA3-CyclinA-HA*, or *pCDNA3-CDK2-Flag* + *pCDNA3-p21-HA* were subjected to Co-IP analysis with anti-HA agarose (A) or anti-Flag-agarose (B). The pull-down products were then analysed by immunoblotting with anti-Flag and anti-HA antibodies. (C) DCAF11 does not interact with CDK2 in yeast. *pGADT7-DCAF11* + *pGBKT7-p21*, *pGADT7-DCAF11* + *pGBKT7-CDK2*, *pGADT7-DCAF11* + *pGBKT7*, *pGBKT7-p21* + *pGADT7*, or *pGBKT7-CDK2* + *pGADT7* were co-transformed into the yeast strain AH109, followed

by plating onto synthetic dropout medium (lacking Trp and Leu, SC-T/L). Positive colonies were then used to determine interactions on medium lacking Trp, Leu, and His (SC-T/L/H). Serial 10-fold dilutions are indicated.

**Supplementary Table-1. Main candidate proteins interacting with DCAF11 in human osteosarcoma cells**

| <b>Accession Number</b> | <b>Protein ID</b>                                     | <b>Symbol</b> | <b>Molecular Weight</b> | <b>MASCOT Score</b> |
|-------------------------|-------------------------------------------------------|---------------|-------------------------|---------------------|
| Q16531                  | Damaged DNA binding protein 1                         | DDB1          | 127 kDa                 | 974                 |
| Q92905                  | COP9 Signalosome Subunit 5                            | COPS5         | 37.6 kDa                | 903                 |
| Q13620                  | Cullin 4B                                             | CUL4B         | 104 kDa                 | 873                 |
| O95831                  | Apoptosis Inducing Factor, Mitochondrion-Associated 1 | AIFM1         | 67 kDa                  | 661                 |
| Q715N1                  | COP9 Signalosome Subunit 6                            | COPS6         | 36 kDa                  | 509                 |
| Q14010                  | Cyclin-Dependent Kinase Inhibitor 1A                  | CDKN1A        | 18 kDa                  | 488                 |
| Q13363                  | C-Terminal Binding Protein 1                          | CtBP1         | 39 kDa                  | 369                 |
| P62877                  | RING-Box 1                                            | RBX1          | 12 kDa                  | 253                 |
| Q99460                  | Proteasome 26S subunit, non-ATPase 1                  | PSMD1         | 106 kDa                 | 181                 |
| P24941                  | Cyclin-Dependent Kinase 2                             | CDK2          | 34 kDa                  | 106                 |

**Supplementary Table-2. Primers used for qRT-PCR**

| <b>Gene</b> | <b>Forward</b>                | <b>Reverse</b>                 |
|-------------|-------------------------------|--------------------------------|
| CUL1        | 5'-CAGCATTCAAGTGCTGAGCT-3'    | 5'-GCTGGCGTAGAAAGCTGTGAAT-3'   |
| CUL2        | 5'-TGTGCTACTCCACAGACATC-3'    | 5'-GGTTGTAAGGGTAACAGGTA-3'     |
| CUL3        | 5'-AGGTGATTGCTGCTATTCTG-3'    | 5'-ACGTCTCTTCTTCTTCTGGC-3'     |
| CUL4A       | 5'-TGTGGCAAAGCACGTGTGCT-3'    | 5'-TGACGATAGCAGCATCAATCTG-3'   |
| CUL4B       | 5'-GGAGAACACTGCAGTCATTAG-3'   | 5'-GCAGCATCAATTTGATACTGTCTG-3' |
| CUL5        | 5'-TGCAGTAAGATGTCTCTAGCA-3'   | 5'-GATGACAGGAAAGCTCTCATG-3'    |
| CUL7        | 5'-AGACATGCTCAATCAGGCGATTG-3' | 5'-CTTGCAGGTACGTCTGAGGT-3'     |
